# Supplementary material
Source: publisher site journal article supplement (https://www.dovepress.com/article/247088)
Supplement: Supplementary file 1 [file get_supplementary_file.php]

Supporting Information for

# Injectable chitosan-based thermosensitive hydrogel/ nanoparticle-loaded system for local delivery of vancomycin for the treatment of osteomyelitis

Jin Tao1, Yang Zhang2, Ao Shen3, Yunxu Yang1, Lu Diao4, Luye Wang1, Danwei Cai4， Ying Hu1,4*

1 Zhejiang Pharmaceutical College, Ningbo, Zhejiang, China

2 Department of Medicine, Zhejiang Academy of Traditional Chinese Medicine, Hangzhou, Zhejiang, China

3 The University of Queensland, Brisbane 4072, Queensland, Australia

4 School of Pharmaceutical Sciences, Wenzhou Medical University, Wenzhou, Zhejiang, China

*Correspondence:

Prof. Ying Hu

Zhejiang Pharmaceutical College

No. 888, East section, Yinxian Main Road, The Zone of Higher Education, Ningbo, Zhejiang, 315100, China.

Tel: +86 574 8822 2707; Fax: +86 574 8822 3023

E-mail: pharmhawk@126.com


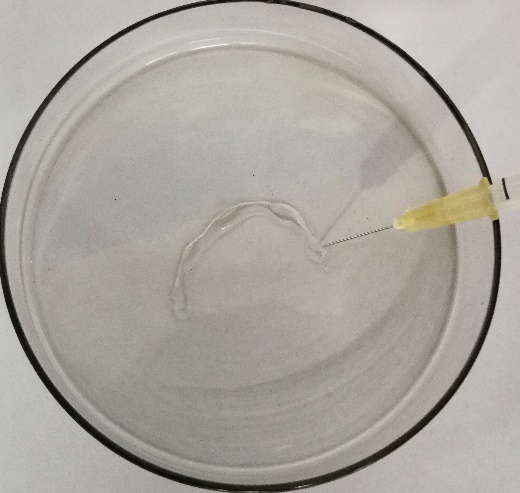


**Figure S1**. Injectability test with needle of VCM-NPs/Gel


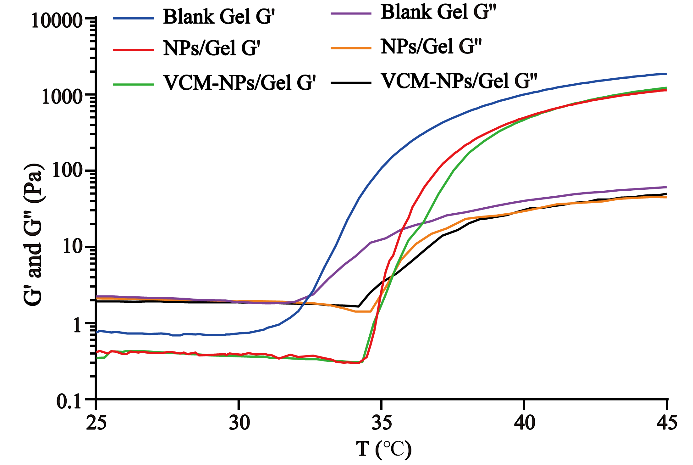


**Figure S2.** The G' and G'' of blank Gel, NPs/Gel, VCM-NPs/Gel from 25 to 45 °C.


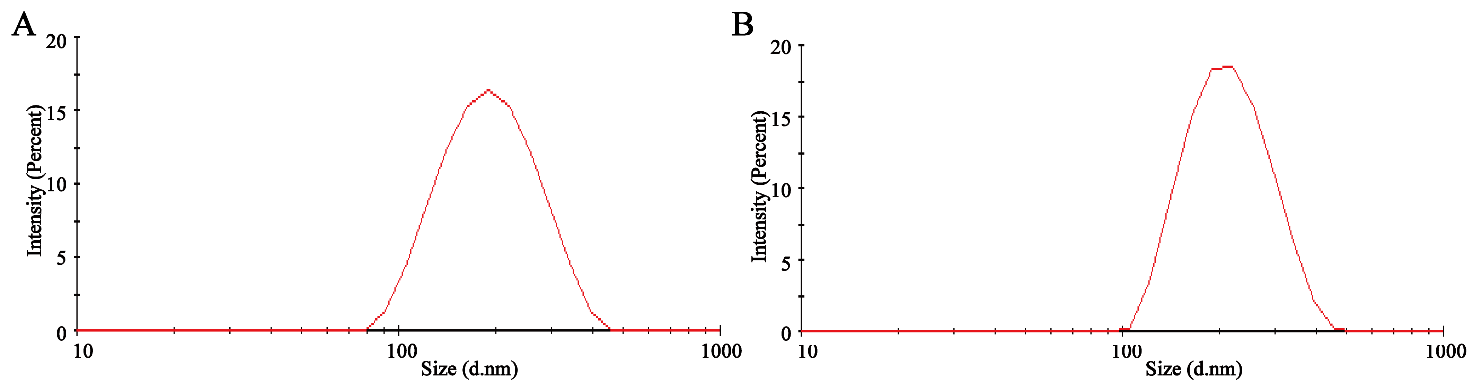


**Figure S3.** Particles size of VCM-NPs collect from VCM-NPs/Gel release medium at day 1(A) and day 10 (B).


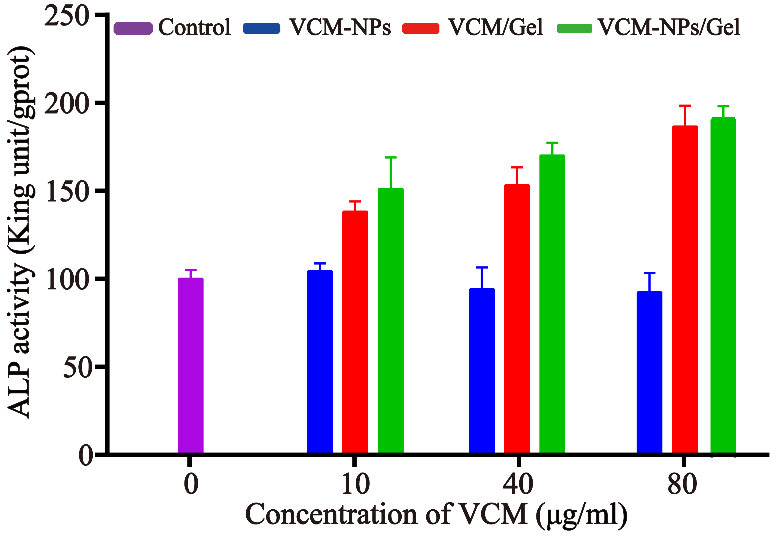


**Figure S4.** ALP activity of OB cells treated with VCM-NPs, VCM/Gel and VCM-NPs/Gel with different concentration at 4 days.


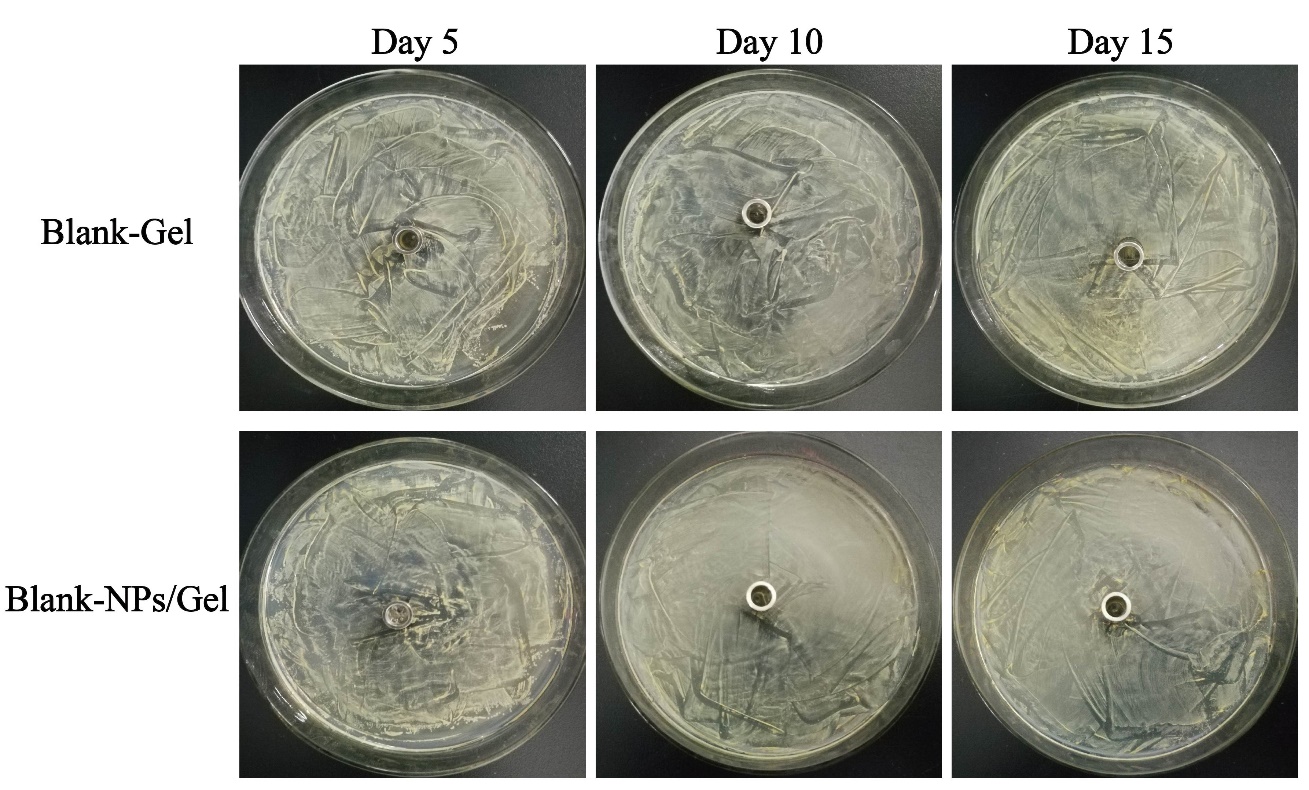


**Figure S5.** Optical images of antibacterial activity of Blank-Gel and Blank-NPs/Gel against S. aureus at 5 day, 10 day and 15 day.
